# Supplementary material for: Drug-Eluting Stents for Acute Coronary Syndrome: A Meta-Analysis of Randomized Controlled Trials
Source: PLOS journal article supplement (doi:10.1371/journal.pone.0072895), 2013-09-05
Supplement: S2 (10.1371/journal.pone.0072895.s002) [file journal.pone.0072895.s002]

**Table S1. Quality assessment of randomized controlled trials**

|  | **Randomization** | |  | **Blinding** | |  | **Description of Withdrawals and Dropouts** | |  |
| --- | --- | --- | --- | --- | --- | --- | --- | --- | --- |
|  |  |  |  |  |  |  |  |  |  |
| **Source** | **allocation concealment** | **method of**  **randomization**  **described adequately** |  | **blinded to the**  **intervention** | **outcome**  **ascertained**  **blindly** |  | **loss to**  **follow-up described** | **intention-to-**  **treat analysis** | **Jadad Score** |
| KOMER, 2011 | ■ | ■ |  |  | ■ |  | ■ | ■ | 4 |
| Sawada T, 2012 |  | ■ |  |  | ■ |  | ■ | ■ | 3 |
| SEZE, 2012 | ■ | ■ |  |  | ■ |  | ■ |  | 4 |
| SORT OUT III ACS, 2012 |  | ■ |  |  | ■ |  | ■ | ■ | 3 |
| XAMI 2012 | ■ | ■ |  |  | ■ |  | ■ | ■ | 4 |
| ZEST AMI, 2009 | ■ | ■ |  |  | ■ |  | ■ | ■ | 4 |
